# Supplementary figures and images for: Male and female recombination landscapes of diploid Arabidopsis arenosa
Source: PubMed Central journal article supplement — Genetics. 2022 Jan 6;220(3):iyab236. doi: 10.1093/genetics/iyab236 (PMC8893250; doi:10.1093/genetics/iyab236), 2022-01-06

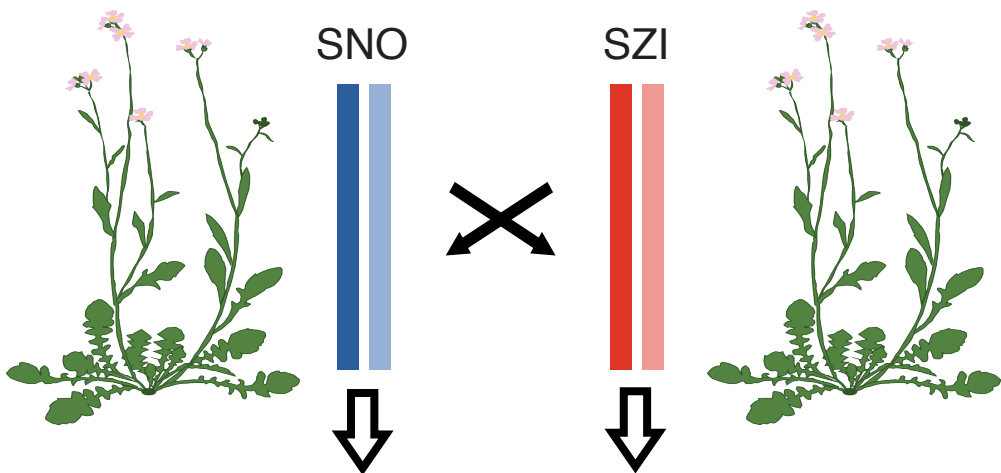

SNOxSZI-F1

SZIxSNO-F1

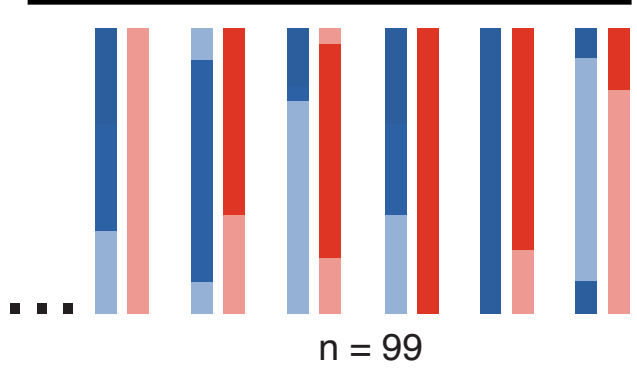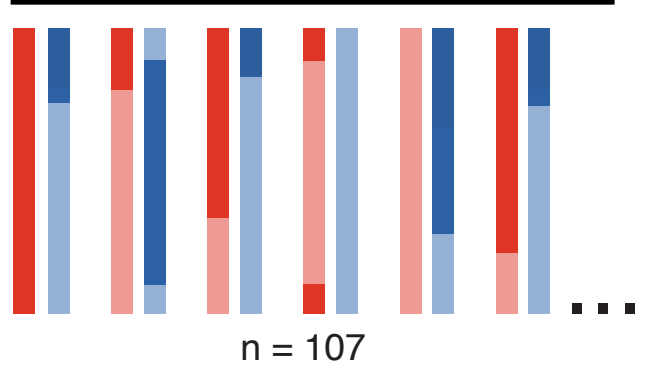

Supplement: iyab236_supplemental_material_figure_s1.pdf [file iyab236_supplemental_material_figure_s1.pdf]

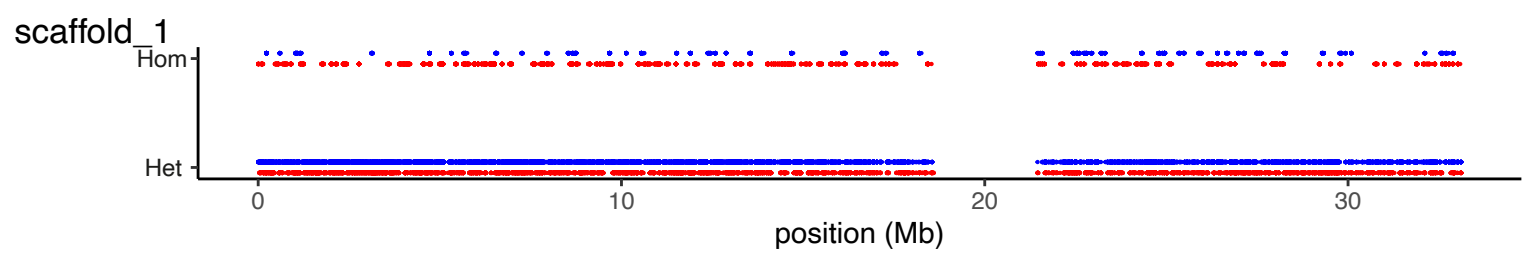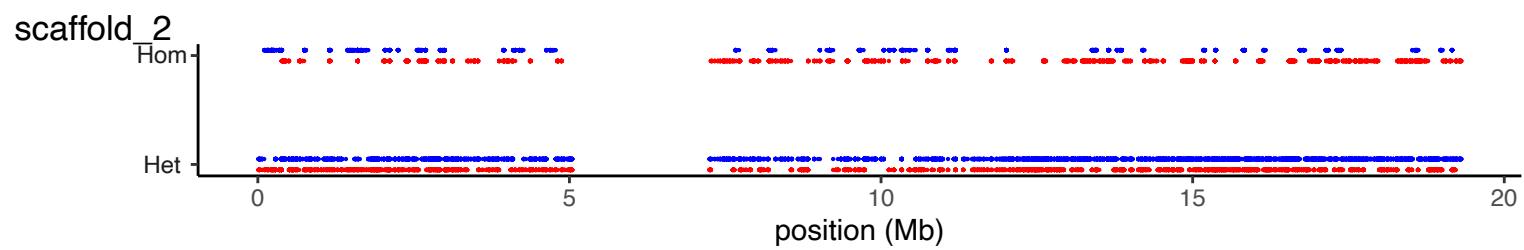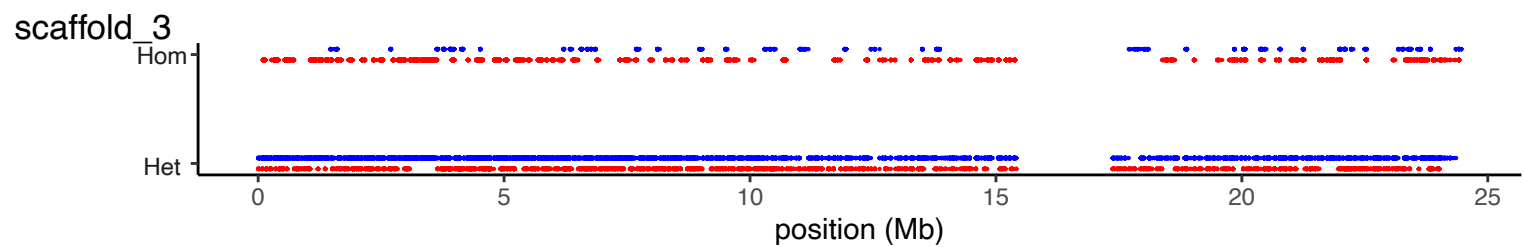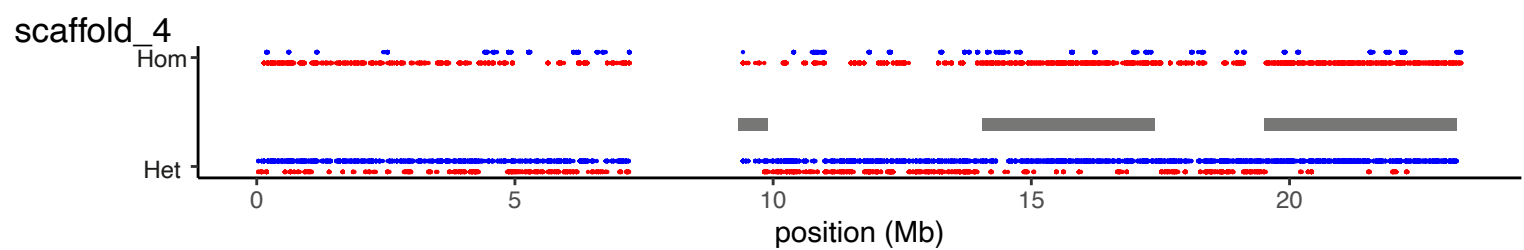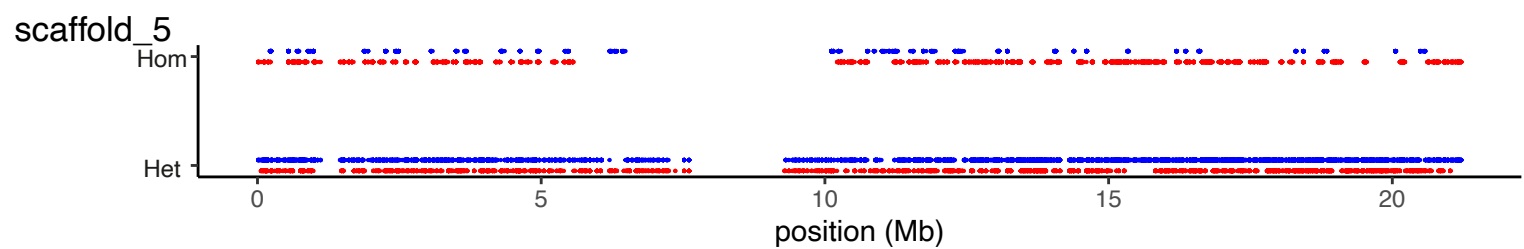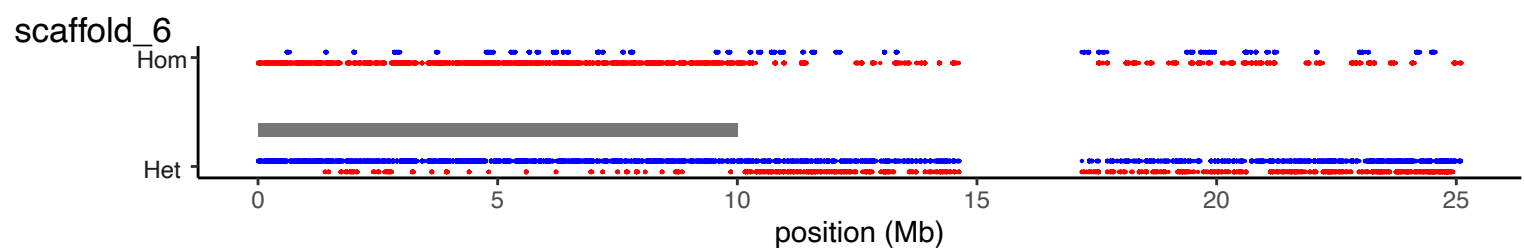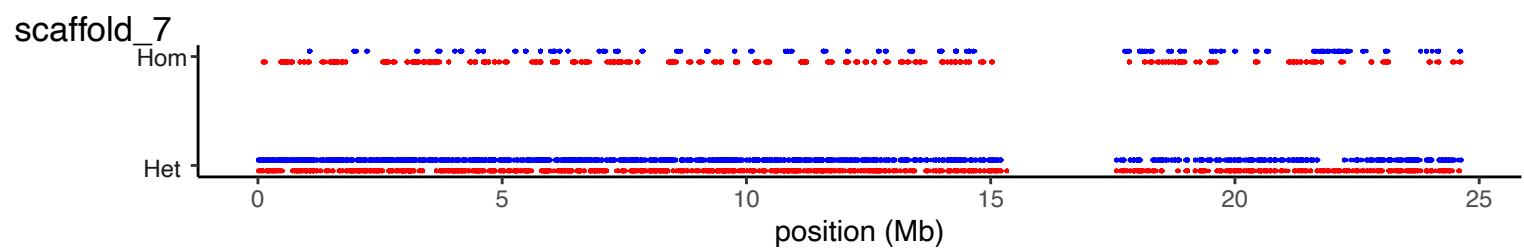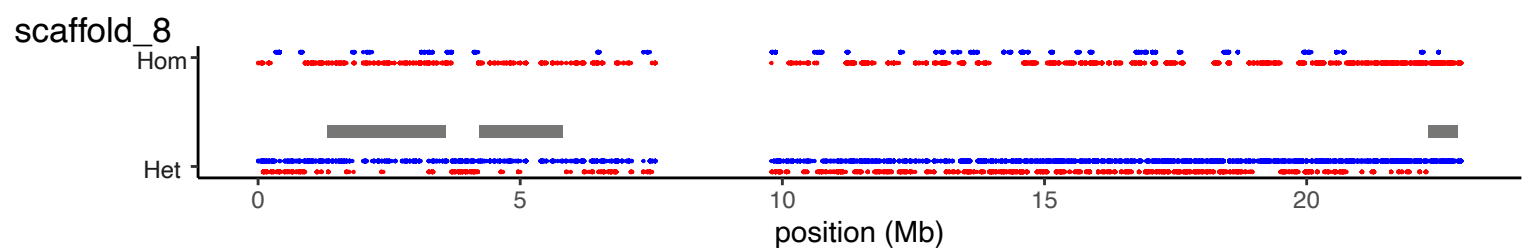

Supplement: iyab236_supplemental_material_figure_s2.pdf [file iyab236_supplemental_material_figure_s2.pdf]

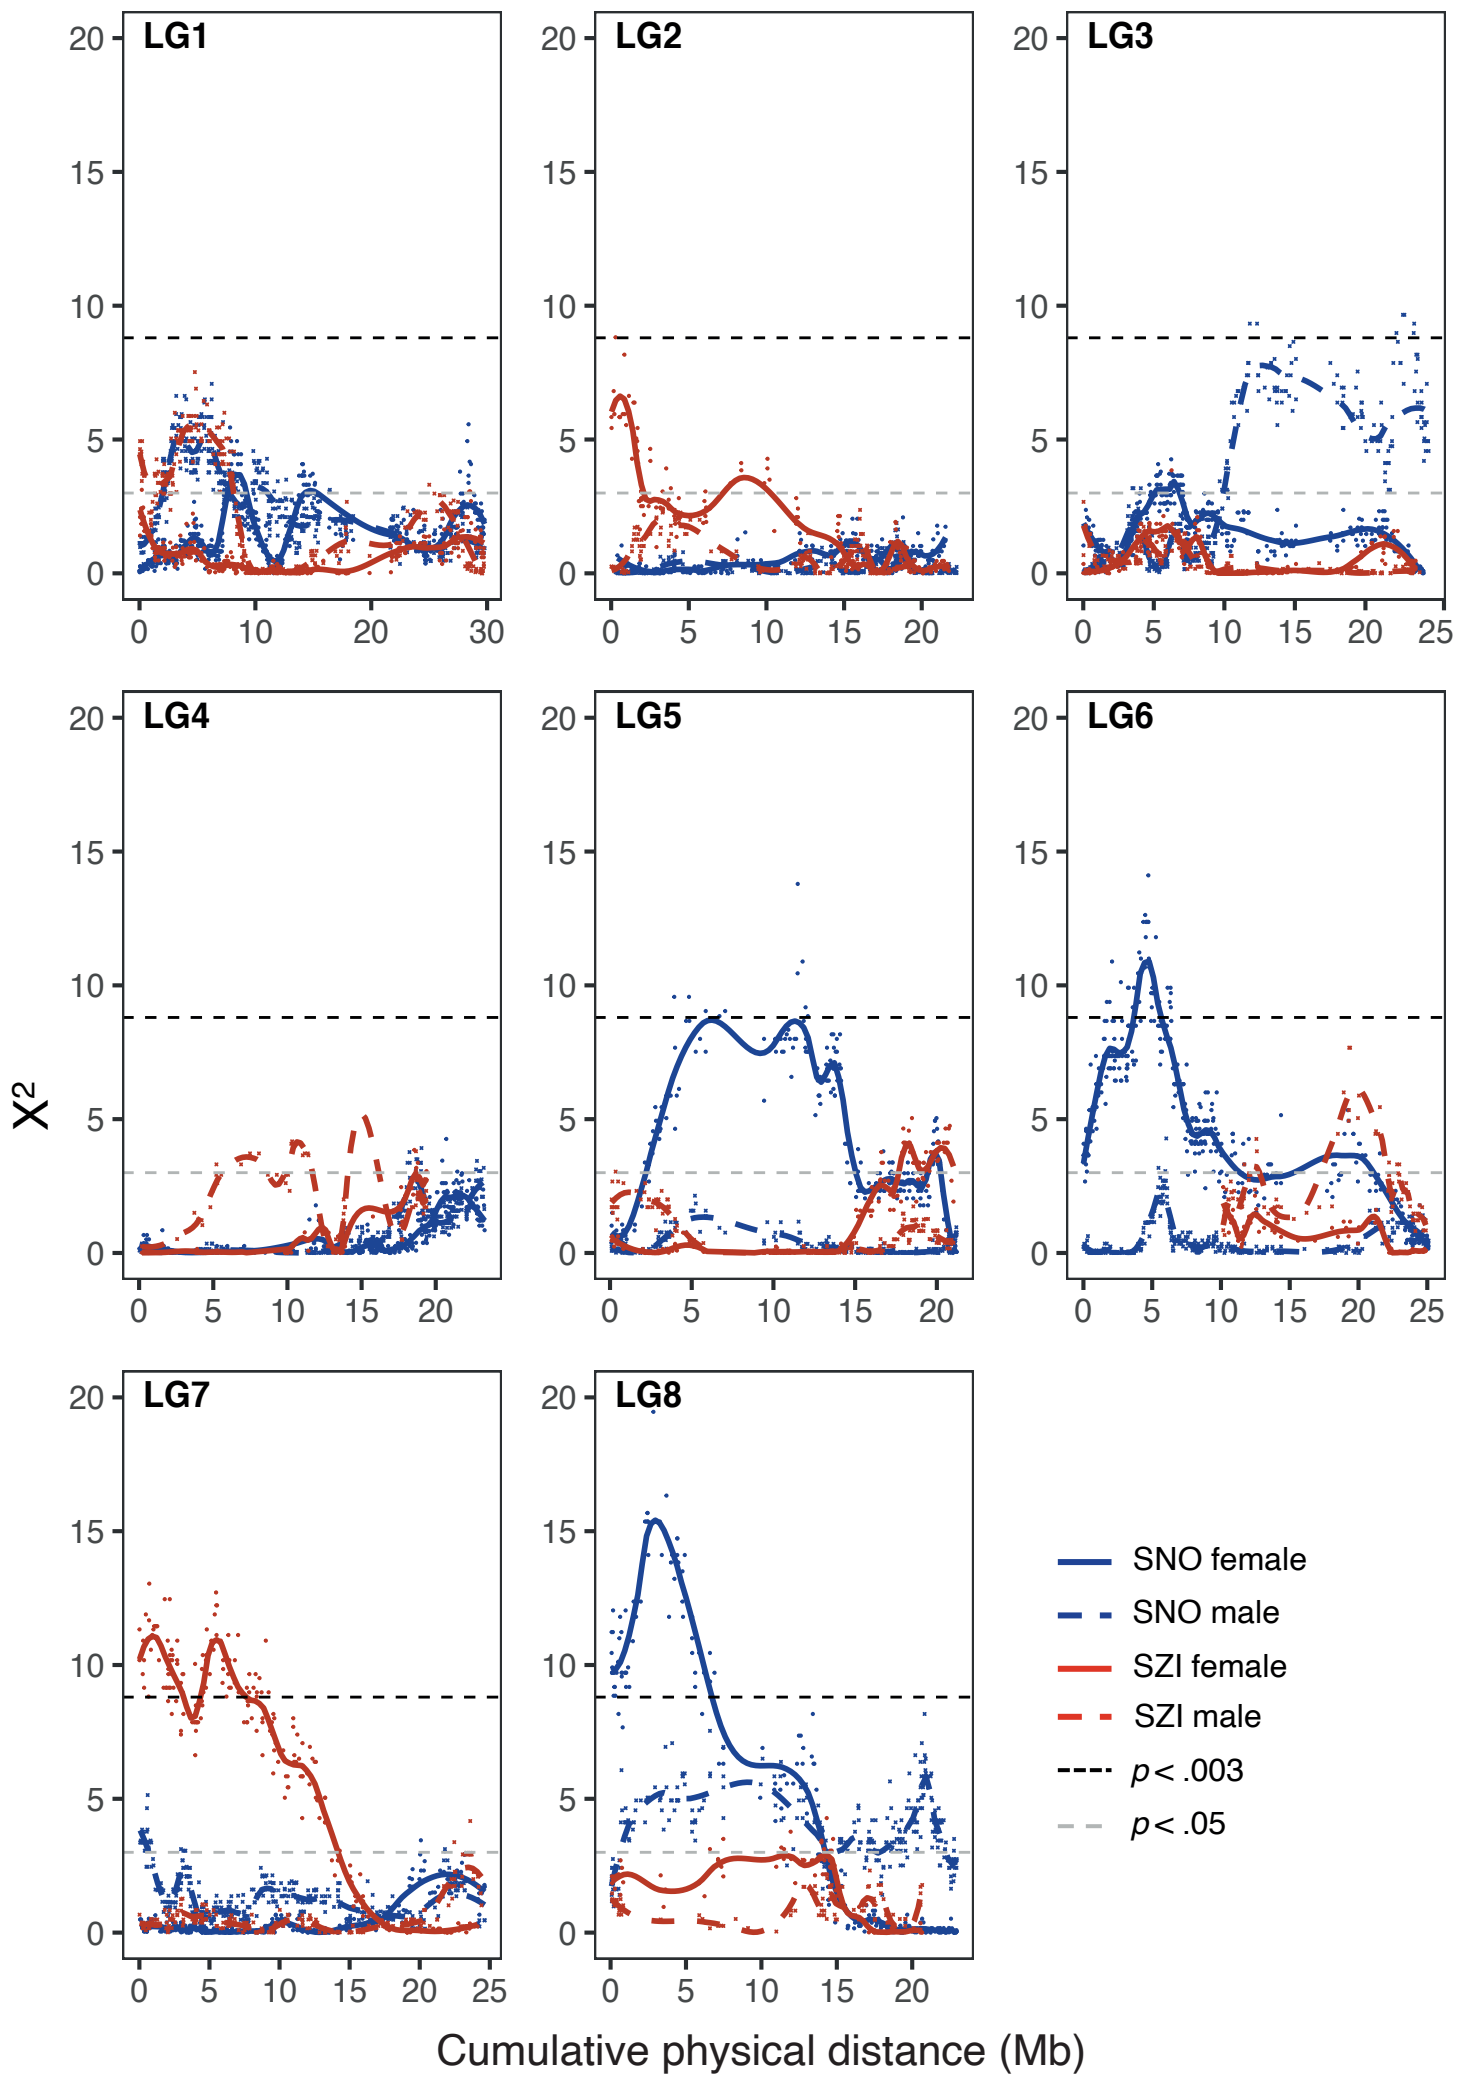

Cumulative physical distance (Mb)

Supplement: iyab236_supplemental_material_figure_s3.pdf [file iyab236_supplemental_material_figure_s3.pdf]

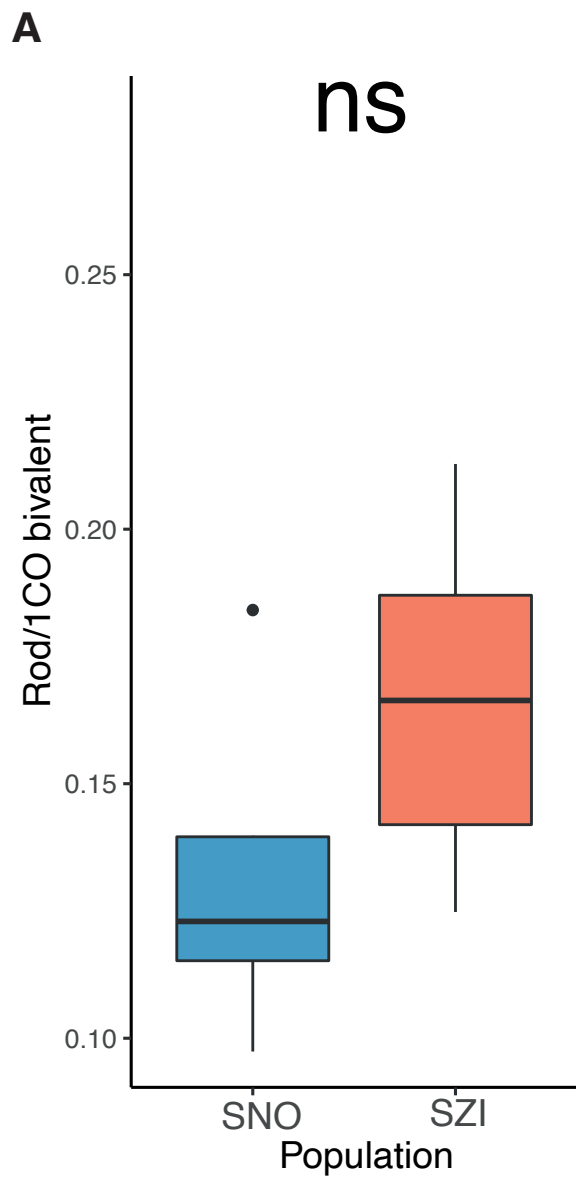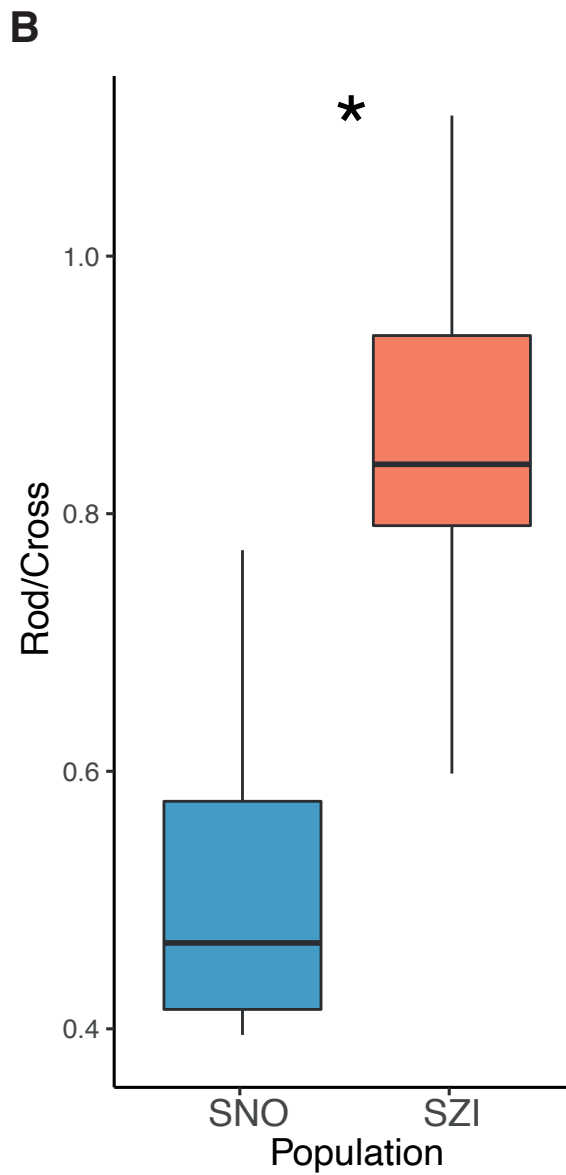

Supplement: iyab236_supplemental_material_figure_s4.pdf [file iyab236_supplemental_material_figure_s4.pdf]

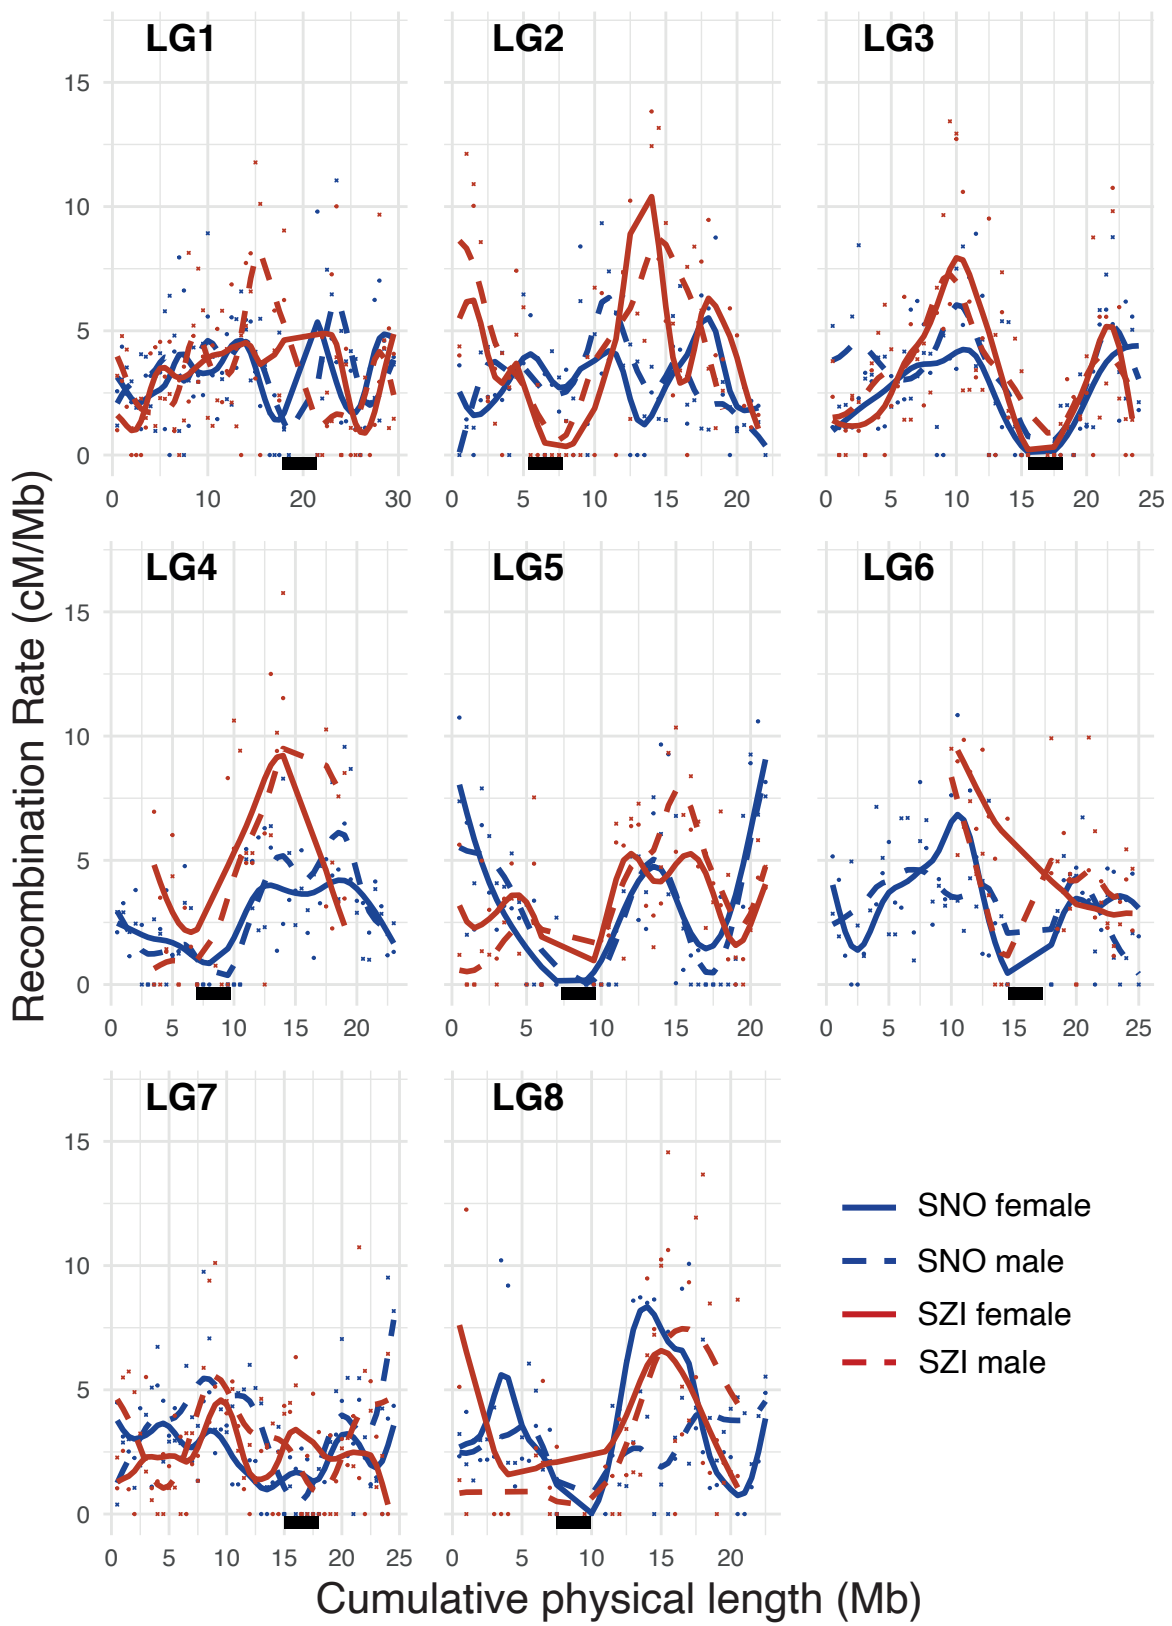

Supplement: iyab236_supplemental_material_figure_s5.pdf [file iyab236_supplemental_material_figure_s5.pdf]
